# Supplementary material for: Effect of the effective refractive index on the radiative decay rate in nanoparticle thin films
Source: Royal Society of Chemistry journal article supplement (doi:10.1039/d3nr03348a), 2023-01-01
Supplement: d3nr03348a1.pdf [file d3nr03348a1.pdf]

Supporting information of:

## Effect of the effective refractive index on the radiative decay rate in nanoparticle thin films

*Manuel Romero, Juan Ramón Sánchez-Valencia, Gabriel Lozano, and Hernán Míguez\*.*

Institute of Materials Science of Seville, Spanish National Research Council – University of Seville, C. Américo Vespucio 49, 41092, Seville, Spain

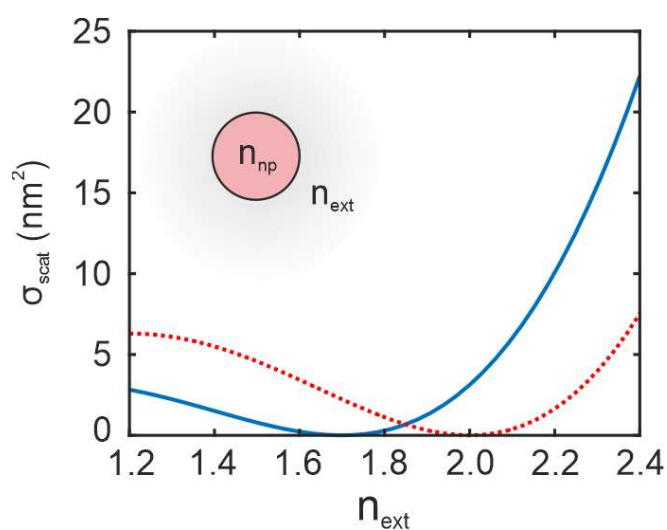

*Figure S1.* Mie calculations for the scattering cross section of a nanoparticle of 50 nm diameter and a refractive index  $n_{\text{np}}=1.7$  (blue solid line) and  $n_{\text{np}}=2.0$  (red dashed line) immersed in a homogeneous medium with refractive index  $n_{\text{ext}}$ . Calculation are shown for  $\lambda=620$  nm.

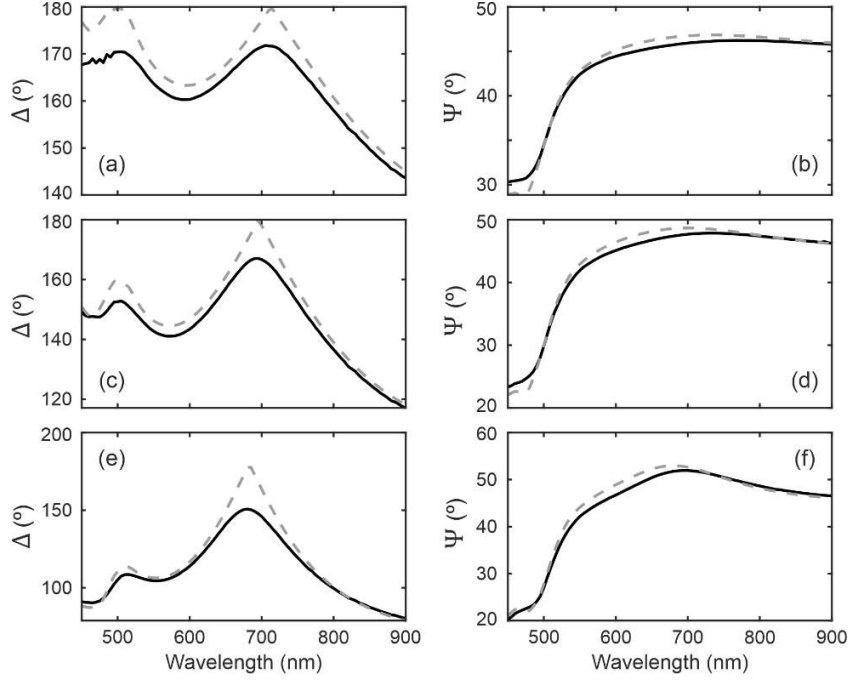

Figure S2. Ellipsometry fittings for three different incident angles: (a-b)  $\theta_{in} = 55^\circ$ , (c-d)  $\theta_{in} = 65^\circ$  and (e-f)  $\theta_{in} = 75^\circ$ . Measurements correspond to a  $\text{GdVO}_4:\text{Eu}^{3+}$  reference sample deposited over a thick gold layer. Theoretical fitting was obtained using  $n_{\text{eff}}=1.4$ , confirming the results obtained by fitting ballistic transmittance and specular reflectance spectra.

PL decay spectra can be fitted in the Inokuti-Hirayama model using the following function:

$$I(t) = I_0 \cdot \exp(-\Gamma_{int} \cdot t - X_s(\Gamma_{int} \cdot t)^{3/J}) \quad (\text{S1})$$

$\Gamma_{int}$  being the intrinsic decay rate of the cations (the rate if energy transfer between the cations did not occur) and  $X_s$  the energy transfer parameter, which depends on cation concentration  $N_0$  and the critical radius  $R_0$  in the following manner:

$$X_s = \frac{4\pi}{3} \gamma(J) \left(1 - \frac{3}{J}\right) N_0 R_0^3 \quad (\text{S2})$$

Where  $\gamma(J)$  is the gamma function, and  $J$  is the multipolar interaction parameter, which takes the value of  $J=10$  for  $\text{Eu}^{3+}$ .

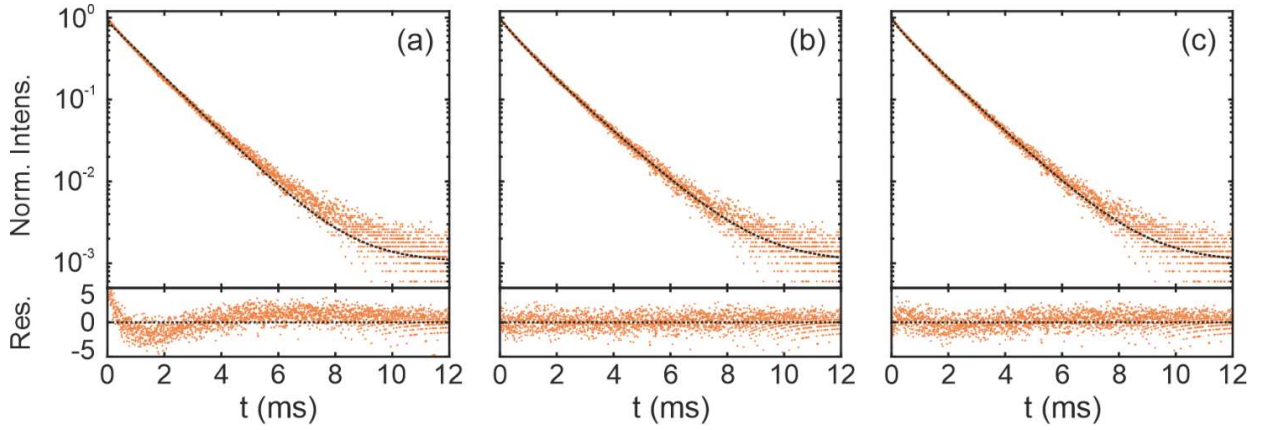

Figure S3. Comparison between PL decay fittings for an only-phosphors sample employing different decay models: (a) single exponential, (b) biexponential and (c) Inokuti-Hirayama model.

Calculated reduced chi-square  $\chi^2$  values are: (a) 1.80, (b) 1.15 and (c) 1.22.

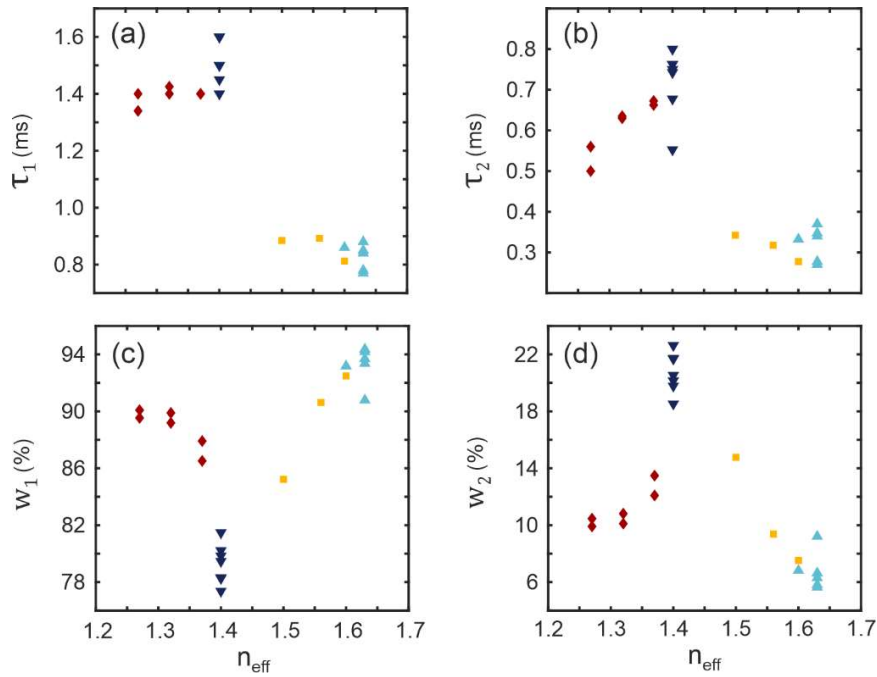

Figure S4. Bi-exponential fitting parameters used for PL decay measurements. Lifetimes of both long (a) and short (b) components are included as well as its corresponding weights (c-d).

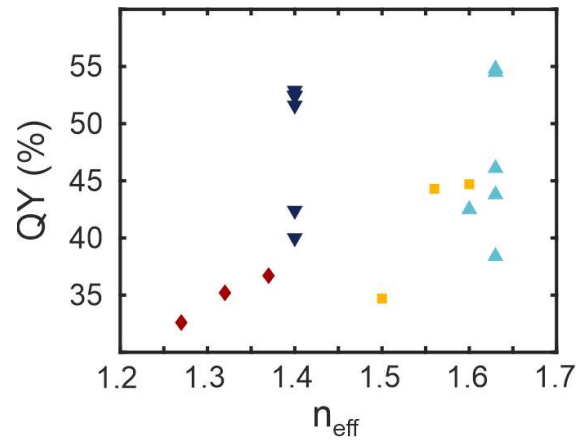

Figure S5. Absolute quantum yield measurements for samples with different effective refractive index.

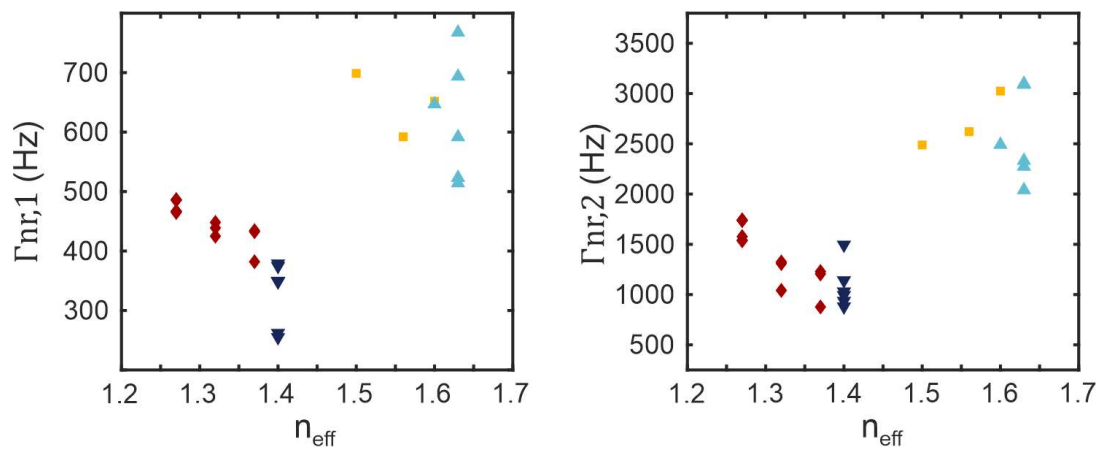

Figure S6. Calculated non-radiative rates for the two components of the bi-exponential PL decay.

The relationship between PLQY and transition rates in the Inokuti-Hirayama model can be made as follows:

$$PLQY = \frac{\Gamma_{rad}}{(1+(R_0/R)^J) \cdot \Gamma_{int}} \quad (S3)$$

where R is the average distance between RE cations in the nanoparticle, which can be estimated from the doping concentration (10% in our case). Using this expression combined with PL decay fittings and PLQY measurements we can separate between the radiative and non-radiative components of the decay as shown in Figure S7.

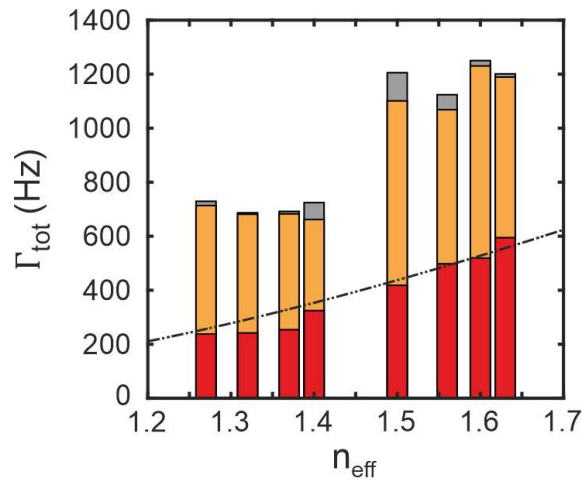

Figure S7. Radiative rate (red bottom bars), non-radiative rate (orange middle bars) and Eu-Eu transfer rate (grey top bars) obtained by using the Inokuti-Hirayama model given by Equations S1-S3. Black dashed dotted line corresponds to our empirical correction (also shown in Figure 5). Each bar corresponds to the average of the samples with the same effective refractive index.
